# Supplementary material for: Urchin-like hollow SiO2@γ-MnO2 microparticles for the rapid degradation of organic dyes
Source: Royal Society of Chemistry journal article supplement (doi:10.1039/d1ra06490h), 2022-01-01
Supplement: d1ra06490h1.pdf [file d1ra06490h1.pdf]

## Supporting Information

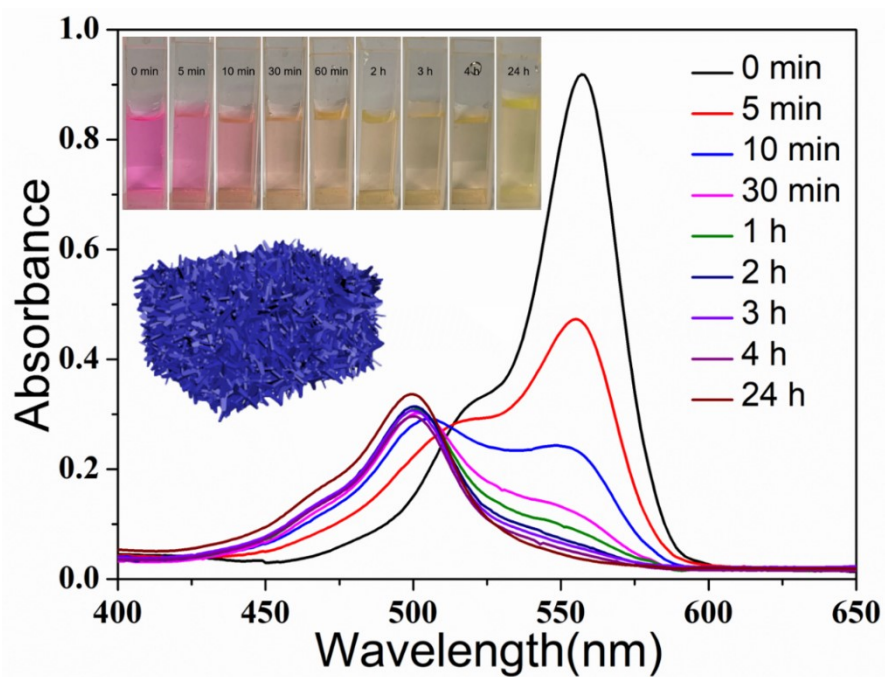

Fig. S1. UV-Vis spectra of RhB degradation by pure MnO<sub>2</sub> particles at pH = 3.5

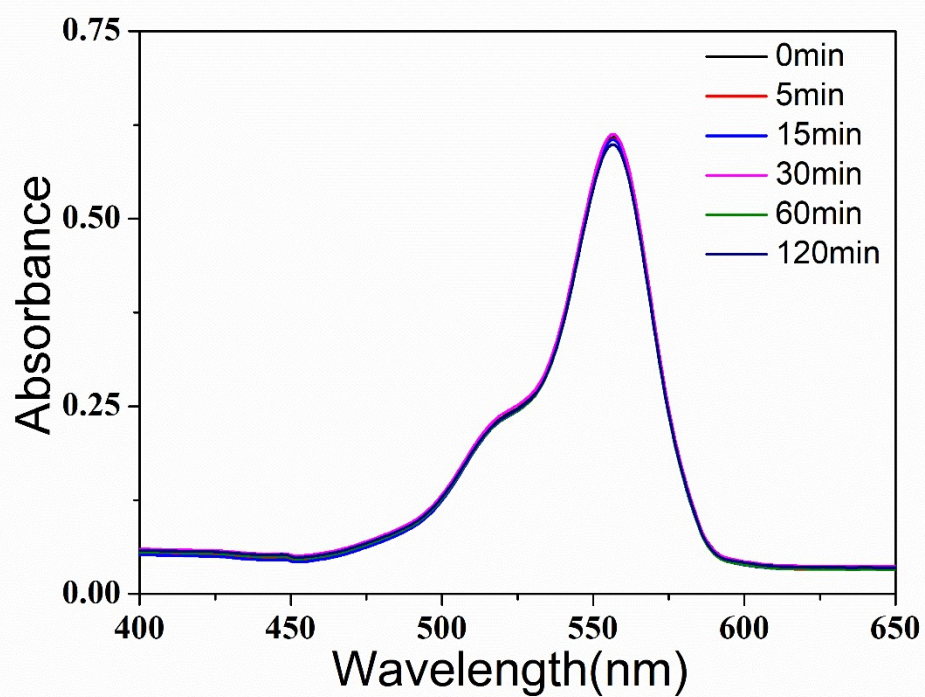

Fig. S2. UV-Vis spectra of RhB degradation by pure hollow SiO<sub>2</sub> microspheres at pH = 3.5
